# Supplementary material
Source: PubMed Central journal article supplement (PMC5833604)
Supplement: jamaophthalmol-136-53-s001.pdf [file jamaophthalmol-136-53-s001.pdf]

## Supplementary Online Content

Stagg BC, Talwar N, Mattox C, Lee PP, Stein JD. Trends in use of ambulatory surgery centers for cataract surgery in the United States, 2001-2014. *JAMA Ophthalmol*. Published online November 22, 2017. doi:10.1001/jamaophthalmol.2017.5101

**eTable 1.** Listing of the Current Procedural Terminology (CPT) and International Classification of Diseases (ICD-9-CM) billing codes capturing the various ocular surgeries of interest

**eTable 2.** Hospital referral regions (HRRs) with the largest change in proportion of cataract surgeries done at ambulatory surgery centers (ASCs) from 2004-2006 to 2012-2014

**eFigure 1.** Geographic variation in the proportion of cataract surgeries performed at an ambulatory surgery center during 2004-2006

**eFigure 2.** Geographic variation in the proportion of cataract surgeries performed at an ambulatory surgery center during 2012-2014

This supplementary material has been provided by the authors to give readers additional information about their work.

**eTable 1.** Listing of the Current Procedural Terminology (CPT) and International Classification of Diseases (ICD-9-CM) billing codes capturing the various ocular surgeries of interest

| <b>Surgery Type</b>           | <b>CPT Codes and ICD-9-CM Procedure Codes</b>                                                                                                                                                                                                                                                                                                                                                                                                                                                                                                                                  |
|-------------------------------|--------------------------------------------------------------------------------------------------------------------------------------------------------------------------------------------------------------------------------------------------------------------------------------------------------------------------------------------------------------------------------------------------------------------------------------------------------------------------------------------------------------------------------------------------------------------------------|
| Cataract Surgery              | 66830, 66840, 66850, 66852, 66920, 66930, 66940, 66982, 66983, 66984, 13.1, 13.11, 13.19, 13.2, 13.3, 13.4, 13.41, 13.42, 13.43, 13.5, 13.51, 13.59, 13.6, 13.69, 13.71                                                                                                                                                                                                                                                                                                                                                                                                        |
| Strabismus Surgery            | 67311, 67312, 67314, 67316, 67318, 67320, 67331, 67332, 67334, 67335, 67340, 67343, 67345, 67346, 67399, 15.1, 15.11, 15.12, 15.13, 15.19, 15.2, 15.21, 15.22, 15.29, 15.3, 15.4, 15.5, 15.6, 15.7, 15.9                                                                                                                                                                                                                                                                                                                                                                       |
| Cornea Surgery                | 65400, 65410, 65420, 65426, 65436, 65450, 65600, 65710, 65730, 65750, 65755, 65756, 65760, 65765, 65767, 65771, 65780, 65781, 65782, 11.3, 11.32, 11.39, 11.41, 11.42, 11.43, 11.49, 11.52, 11.59, 11.6, 11.60, 11.61, 11.62, 11.63, 11.64, 11.69, 11.7, 11.71, 11.72, 11.73, 11.74, 11.75, 11.76, 11.79, 11.91, 11.92, 11.99                                                                                                                                                                                                                                                  |
| Glaucoma Surgery <sup>a</sup> | 65820, 65850, 65865, 66150, 66155, 65160, 66165, 66170, 66172, 65174, 65175, 66180, 66185, 66250, 66500, 66505, 66605, 66625, 66630, 66635, 66700, 66710, 66711, 66720, 66740, 0376T, 0123T, 0253T, 0191T, 66174, 66175, 66179, 66180, 66183, 66184, 0176T, 0177T, 12.1, 12.11, 12.12, 12.13, 12.14, 12.2, 12.21, 12.22, 12.29, 12.3, 12.31, 12.32, 12.33, 12.34, 12.35, 12.39, 12.4, 12.40, 12.41, 12.42, 12.43, 12.44, 12.5, 12.51, 12.52, 12.53, 12.54, 12.55, 12.59, 12.6, 12.61, 12.62, 12.63, 12.64, 12.65, 12.66, 12.67, 12.69, 12.7, 12.71, 12.72, 12.73, 12.74, 12.79 |
| Retina Surgery                | 67005, 67010, 67105, 67025, 67027, 67028, 67030, 67031, 67036, 67038, 67039, 67040, 67041, 67042, 67043, 67101, 67105, 67107, 67108, 67110, 67112, 67113, 67115, 67120, 67121, 67141, 67145, 67208, 67210, 67218, 67220, 67221, 67225, 67227, 67228, 67229, 67250, 67255, 14.21, 14.22, 14.23, 14.24, 14.25, 14.31, 14.32, 14.33, 14.34, 14.35, 14.39, 14.51, 14.52, 14.53, 14.54, 14.55, 14.75, 14.79, 14.26, 14.27, 14.29, 14.4, 14.41, 14.49, 14.6, 14.71, 14.72, 14.73, 14.74, 14.9                                                                                        |

CPT = Current Procedural Terminology

ICD-9-CM = International Classification of Diseases Version 9, Clinical Modification

<sup>a</sup> Because most glaucoma lasers are performed in clinic and not in the operating room, they are not included in this analysis.

**eTable 2.** Hospital referral regions (HRRs) with the largest change in proportion of cataract surgeries done at ambulatory surgery centers (ASCs) from 2004-2006 to 2012-2014

| <b>HRRs With the Largest Decrease in Proportion of Cataract Surgeries Done at ASCs From 2004-2006 to 2012-2014</b> |                    |                                 |                                                         |                    |                                 |                                                         |                    |
|--------------------------------------------------------------------------------------------------------------------|--------------------|---------------------------------|---------------------------------------------------------|--------------------|---------------------------------|---------------------------------------------------------|--------------------|
| <b>HRR</b>                                                                                                         | <b>2004-2006</b>   |                                 |                                                         | <b>2012-2014</b>   |                                 |                                                         | <b>Decrease, %</b> |
|                                                                                                                    | <b>No. at ASCs</b> | <b>Total No. at ASCs+ HOPDs</b> | <b>Proportion of Cataract Surgeries Done at ASCs, %</b> | <b>No. at ASCs</b> | <b>Total No. at ASCs+ HOPDs</b> | <b>Proportion of Cataract Surgeries Done at ASCs, %</b> |                    |
| Albuquerque, NM                                                                                                    | 741                | 803                             | 92.3                                                    | 94                 | 255                             | 36.9                                                    | 55.4               |
| Winston-Salem, NC                                                                                                  | 504                | 661                             | 76.2                                                    | 421                | 1196                            | 35.2                                                    | 41.0               |
| Lafayette, LA                                                                                                      | 180                | 228                             | 78.9                                                    | 61                 | 133                             | 45.9                                                    | 33.1               |
| Dayton, OH                                                                                                         | 974                | 1284                            | 75.9                                                    | 725                | 1295                            | 56.0                                                    | 19.9               |
| Hartford, CT                                                                                                       | 244                | 359                             | 68.0                                                    | 85                 | 162                             | 52.5                                                    | 15.5               |
| <b>HRRs With the Largest Increase in Proportion of Cataract Surgeries Done at ASCs From 2004-2006 to 2012-2014</b> |                    |                                 |                                                         |                    |                                 |                                                         |                    |
| <b>HRR</b>                                                                                                         | <b>2004-2006</b>   |                                 |                                                         | <b>2012-2014</b>   |                                 |                                                         | <b>Increase, %</b> |
|                                                                                                                    | <b>No. at ASCs</b> | <b>Total No. at ASCs+ HOPDs</b> | <b>Proportion of Cataract Surgeries Done at ASCs, %</b> | <b>No. at ASCs</b> | <b>Total No. at ASCs+ HOPDs</b> | <b>Proportion of Cataract Surgeries Done at ASCs, %</b> |                    |
| Hickory, NC                                                                                                        | 15                 | 100                             | 15.0                                                    | 123                | 129                             | 95.3                                                    | 80.3               |
| Appleton, WI                                                                                                       | 31                 | 198                             | 15.7                                                    | 229                | 301                             | 76.1                                                    | 60.4               |
| Providence, RI                                                                                                     | 338                | 1577                            | 21.4                                                    | 1764               | 2328                            | 75.8                                                    | 54.4               |
| Akron, OH                                                                                                          | 95                 | 245                             | 38.8                                                    | 217                | 234                             | 92.7                                                    | 54.0               |
| Portland, OR                                                                                                       | 119                | 670                             | 17.8                                                    | 957                | 1437                            | 66.6                                                    | 48.8               |

Abbreviation: HOPD, hospital outpatient department.

**eFigure 1.** Geographic variation in the proportion of cataract surgeries performed at an ambulatory surgery center during 2004-2006

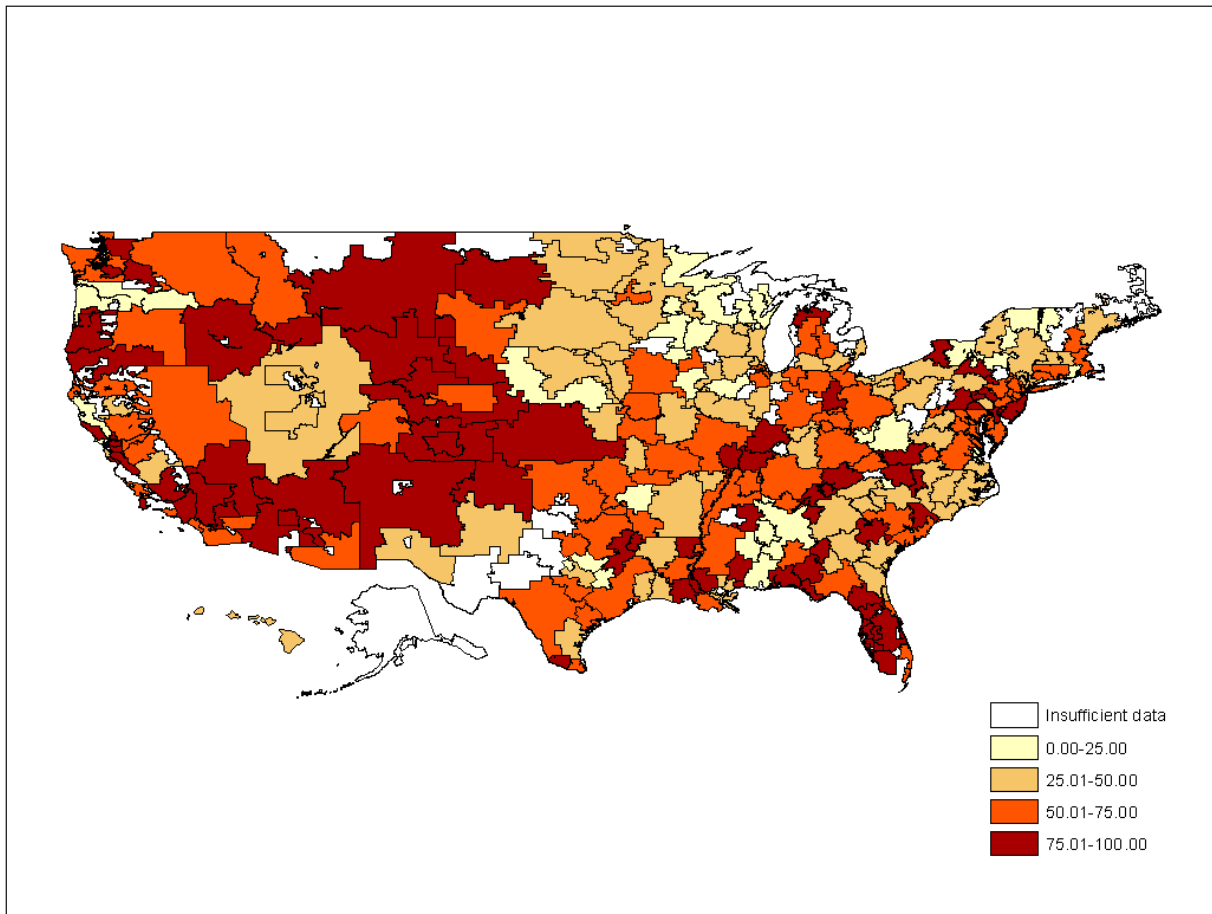

Map showing the proportion of cataract surgeries performed at ambulatory surgery centers from 2004-2006 by hospital referral region (HRR). HRRs with fewer than 20 patients undergoing cataract surgery (n=33) are reported as “Insufficient Data”.

**eFigure 2.** Geographic variation in the proportion of cataract surgeries performed at an ambulatory surgery center during 2012-2014

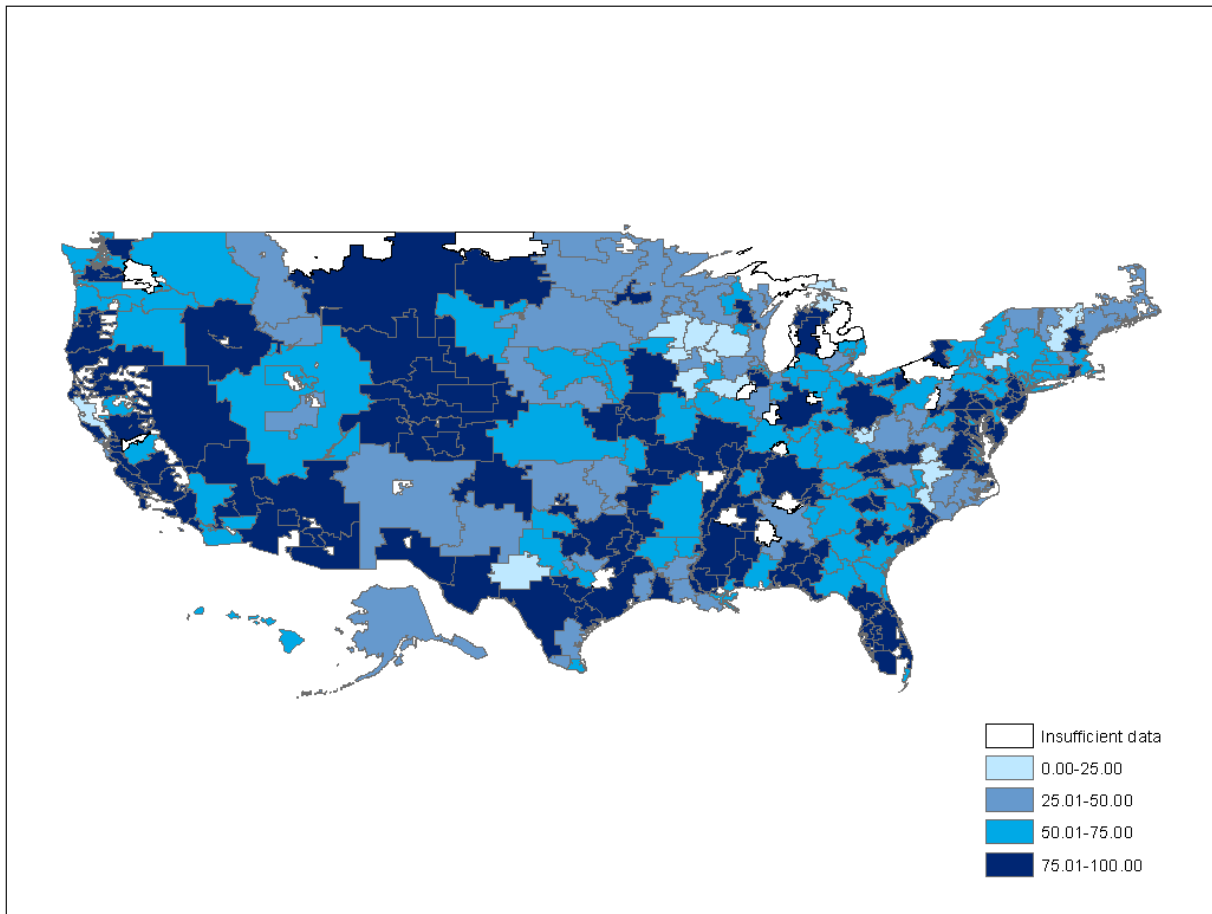

Map showing the proportion of cataract surgeries performed at ambulatory surgery centers from 2012-2014 by hospital referral region (HRR). HRRs with fewer than 20 patients undergoing cataract surgery (n=19) are reported as “Insufficient Data”.
